# Supplementary material for: Drosophila Torsin Protein Regulates Motor Control and Stress Sensitivity and Forms a Complex with Fragile-X Mental Retardation Protein
Source: Neural Plast. 2016 May 30;2016:6762086. doi: 10.1155/2016/6762086 (PMC4904285; doi:10.1155/2016/6762086)
Supplement: Supplementary file 1 — Prediction of Glycosylation in DTor. [file 6762086.f1.zip]

Archive with 2 entries (2 files):
- 6762086.f1.docx
- description.docx
